# Supplementary material
Source: PubMed Central journal article supplement (PMC1599880)
Supplement: rspb20043013s02.pdf [file rspb20043013s02.pdf]

# ELECTRONIC APPENDIX

This is the Electronic Appendix to the article

**Local phylogenetic divergence and global  
evolutionary convergence of skull function  
in reef fishes of the family Labridae**

by

Mark W. Westneat, Michael E. Alfaro, Peter C. Wainwright,  
David R. Bellwood, Justin R. Grubich, Jennifer L. Fessler,  
Kendall D. Clements and Lydia L. Smith

*Proc. R. Soc. B* ([doi:10.1098/rspb.2004.3013](https://doi.org/10.1098/rspb.2004.3013))

Electronic appendices are refereed with the text; however, no attempt is made to impose a uniform editorial style on the electronic appendices.

Electronic Appendix

(A) GenBank accession numbers for genetic data used in phylogenetic analyses.

| Genus                               | species                 | 12S      | 16S      | Tmo4C4   | RAG2     |
|-------------------------------------|-------------------------|----------|----------|----------|----------|
| <b>Perciformes</b>                  |                         |          |          |          |          |
| <i>Epinephelus</i>                  | <i>polyphkadion</i>     | AY279560 | AY279663 | AY279766 | AY279869 |
| <i>Kyphosus</i>                     | <i>vaigiensis</i>       | AY279561 | AY279664 | AY279767 | AY279870 |
| <i>Platax</i>                       | <i>orbicularis</i>      | AY279562 | AY279665 | AY279768 | AY279871 |
| <i>Diagramma</i>                    | <i>pictum</i>           | AY279563 | AY279666 | AY279769 | AY279872 |
| <b>Cichlidae</b>                    |                         |          |          |          |          |
| <i>Ptychochromis</i>                | <i>oligacanthus</i>     | AY279564 | AY279667 | AY279770 | AY279873 |
| <i>Etoplus</i>                      | <i>maculatus</i>        | AY279565 | AY279668 | AY279771 | AY279874 |
| <i>Thorichthys</i>                  | <i>meeki</i>            | AY279566 | AY279669 | AY279772 | AY279875 |
| <b>Pomacentridae</b>                |                         |          |          |          |          |
| <i>Dischistodus</i>                 | <i>chrysopoecilus</i>   | AY279567 | AY279670 | AY279773 | AY279876 |
| <i>Amblyglyphidodon</i>             | <i>leucogaster</i>      | AY279568 | AY279671 | AY279774 | AY279877 |
| <i>Dascyllus</i>                    | <i>trimaculatus</i>     | AY279569 | AY279672 | AY279775 | AY279878 |
| <i>Abudefduf</i>                    | <i>saxatilis</i>        | AY279570 | AY279673 | AY279776 | AY279879 |
| <b>Embiotocidae</b>                 |                         |          |          |          |          |
| <i>Amphistichus</i>                 | <i>argenteus</i>        | AY279571 | AY279674 | AY279777 | AY279880 |
| <i>Rhacochilus</i>                  | <i>vacca</i>            | AY279572 | AY279675 | AY279778 | AY279881 |
| <i>Embiotoca</i>                    | <i>jacksoni</i>         | AY279573 | AY279676 | AY279779 | AY279882 |
| <b>Labridae, Scaridae, Odacidae</b> |                         |          |          |          |          |
| <i>Achoerodus</i>                   | <i>viridis</i>          | AY279574 | AY279677 | AY279780 | AY279883 |
| <i>Anampses</i>                     | <i>caeruleopuntatus</i> | AY279575 | AY279678 | AY279781 | AY279884 |
| <i>Anampses</i>                     | <i>neoguinaicus</i>     | AY279576 | AY279679 | AY279782 | AY279885 |
| <i>Austrolabrus</i>                 | <i>maculatus</i>        | AY279577 | AY279680 | AY279783 | AY279886 |
| <i>Bodianus</i>                     | <i>mesothorax</i>       | AY279578 | AY279681 | AY279784 | AY279887 |
| <i>Bodianus</i>                     | <i>rufus</i>            | AY279579 | AY279682 | AY279785 | AY279888 |
| <i>Cheilinus</i>                    | <i>fasciatus</i>        | AY279580 | AY279683 | AY279786 | AY279889 |
| <i>Cheilinus</i>                    | <i>oxycephalus</i>      | AY279581 | AY279684 | AY279787 | AY279890 |
| <i>Cheilinus</i>                    | <i>undulatus</i>        | AY279582 | AY279685 | AY279788 | AY279891 |
| <i>Cheilio</i>                      | <i>inermis</i>          | AY279583 | AY279686 | AY279789 | AY279892 |
| <i>Chlorurus</i>                    | <i>sordidus</i>         | AY279584 | AY279687 | AY279790 | AY279893 |
| <i>Choerodon</i>                    | <i>anchorago</i>        | AY279585 | AY279688 | AY279791 | AY279894 |
| <i>Choerodon</i>                    | <i>schoenleinii</i>     | AY279586 | AY279689 | AY279792 | AY279895 |
| <i>Cirrhilabrus</i>                 | <i>lubbocki</i>         | AY279587 | AY279690 | AY279793 | AY279896 |
| <i>Clepticus</i>                    | <i>parrae</i>           | AY279588 | AY279691 | AY279794 | AY279897 |
| <i>Coris</i>                        | <i>aygula</i>           | AY279589 | AY279692 | AY279795 | AY279898 |
| <i>Coris</i>                        | <i>gaimard</i>          | AY279590 | AY279693 | AY279796 | AY279899 |
| <i>Coris</i>                        | <i>batuensis</i>        | AY279591 | AY279694 | AY279797 | AY279900 |
| <i>Cryptotomus</i>                  | <i>roseus</i>           | AY279592 | AY279695 | AY279798 | AY279901 |
| <i>Cymolutes</i>                    | <i>praetextatus</i>     | AY279593 | AY279696 | AY279799 | AY279902 |

|                         |                       |          |          |          |          |
|-------------------------|-----------------------|----------|----------|----------|----------|
| <i>Cymolutes</i>        | <i>torquatus</i>      | AY279594 | AY279697 | AY279800 | AY279903 |
| <i>Diproctacanthus</i>  | <i>xanthurus</i>      | AY279595 | AY279698 | AY279801 | AY279904 |
| <i>Epibulus</i>         | <i>insidiator</i>     | AY279596 | AY279699 | AY279802 | AY279905 |
| <i>Gomphosus</i>        | <i>varius</i>         | AY279597 | AY279700 | AY279803 | AY279906 |
| <i>Halichoeres</i>      | <i>argus</i>          | AY279598 | AY279701 | AY279804 | AY279907 |
| <i>Halichoeres</i>      | <i>bivittatus</i>     | AY279599 | AY279702 | AY279805 | AY279908 |
| <i>Halichoeres</i>      | <i>hartzfeldi</i>     | AY279600 | AY279703 | AY279806 | AY279909 |
| <i>Halichoeres</i>      | <i>hortulanus</i>     | AY279601 | AY279704 | AY279807 | AY279910 |
| <i>Halichoeres</i>      | <i>margaritaceus</i>  | AY279602 | AY279705 | AY279808 | AY279911 |
| <i>Halichoeres</i>      | <i>marginatus</i>     | AY279603 | AY279706 | AY279809 | AY279912 |
| <i>Halichoeres</i>      | <i>miniatus</i>       | AY279604 | AY279707 | AY279810 | AY279913 |
| <i>Halichoeres</i>      | <i>nicholsi</i>       | AY279605 | AY279708 | AY279811 | AY279914 |
| <i>Halichoeres</i>      | <i>notospilus</i>     | AY279606 | AY279709 | AY279812 | AY279915 |
| <i>Halichoeres</i>      | <i>radiatus</i>       | AY279607 | AY279710 | AY279813 | AY279916 |
| <i>Halichoeres</i>      | <i>scapularis</i>     | AY279608 | AY279711 | AY279814 | AY279917 |
| <i>Halichoeres</i>      | <i>papilionaceus</i>  | AY279609 | AY279712 | AY279815 | AY279918 |
| <i>Halichoeres</i>      | <i>solorensis</i>     | AY279610 | AY279713 | AY279816 | AY279919 |
| <i>Hemigymnus</i>       | <i>melapterus</i>     | AY279611 | AY279714 | AY279817 | AY279920 |
| <i>Hologymnosus</i>     | <i>doliatus</i>       | AY279612 | AY279715 | AY279818 | AY279921 |
| <i>Labrichthys</i>      | <i>unilineatus</i>    | AY279613 | AY279716 | AY279819 | AY279922 |
| <i>Labroides</i>        | <i>bicolor</i>        | AY279614 | AY279717 | AY279820 | AY279923 |
| <i>Labroides</i>        | <i>dimidiatus</i>     | AY279615 | AY279718 | AY279821 | AY279924 |
| <i>Labroides</i>        | <i>rubrolabiatus</i>  | AY279616 | AY279719 | AY279822 | AY279925 |
| <i>Labropsis</i>        | <i>australis</i>      | AY279617 | AY279720 | AY279823 | AY279926 |
| <i>Lachnolaimus</i>     | <i>maximus</i>        | AY279618 | AY279721 | AY279824 | AY279927 |
| <i>Larabicus</i>        | <i>quadrilineatus</i> | AY279619 | AY279722 | AY279825 | AY279928 |
| <i>Leptojulius</i>      | <i>cyanopleura</i>    | AY279620 | AY279723 | AY279826 | AY279929 |
| <i>Macropharyngodon</i> | <i>geoffroy</i>       | AY279621 | AY279724 | AY279827 | AY279930 |
| <i>Macropharyngodon</i> | <i>meleagris</i>      | AY279622 | AY279725 | AY279828 | AY279931 |
| <i>Malapterus</i>       | <i>reticulatus</i>    | AY279623 | AY279726 | AY279829 | AY279932 |
| <i>Neodax</i>           | <i>balteata</i>       | AY279657 | AY279760 | AY279863 | AY279966 |
| <i>Nicholsina</i>       | <i>usta</i>           | AY279624 | AY279727 | AY279830 | AY279933 |
| <i>Notolabrus</i>       | <i>gymnogenis</i>     | AY279625 | AY279728 | AY279831 | AY279934 |
| <i>Novaculoides</i>     | <i>macrolepidotus</i> | AY279626 | AY279729 | AY279832 | AY279935 |
| <i>Novaculichthys</i>   | <i>taeniourus</i>     | AY279627 | AY279730 | AY279833 | AY279936 |
| <i>Odax</i>             | <i>acroptilus</i>     | AY279658 | AY279761 | AY279864 | AY279967 |
| <i>Ophthalmolepsis</i>  | <i>lineolata</i>      | AY279628 | AY279731 | AY279834 | AY279937 |
| <i>Oxycheilinus</i>     | <i>bimaculatus</i>    | AY279629 | AY279732 | AY279835 | AY279938 |
| <i>Oxycheilinus</i>     | <i>celebicus</i>      | AY279630 | AY279733 | AY279836 | AY279939 |
| <i>Oxycheilinus</i>     | <i>unifasciatus</i>   | AY279631 | AY279734 | AY279837 | AY279940 |
| <i>Oxyjulius</i>        | <i>californica</i>    | AY279632 | AY279735 | AY279838 | AY279941 |
| <i>Pictilabrus</i>      | <i>laticlavia</i>     | AY279633 | AY279736 | AY279839 | AY279942 |
| <i>Pseudocheilinus</i>  | <i>octataenia</i>     | AY279634 | AY279737 | AY279840 | AY279943 |

|                       |                      |          |          |          |          |
|-----------------------|----------------------|----------|----------|----------|----------|
| <i>Pseudocoris</i>    | <i>yamashiroi</i>    | AY279635 | AY279738 | AY279841 | AY279944 |
| <i>Pseudodax</i>      | <i>moluccanus</i>    | AY279636 | AY279739 | AY279842 | AY279945 |
| <i>Pseudojuloides</i> | <i>atavai</i>        | AY279637 | AY279740 | AY279843 | AY279946 |
| <i>Psuedojuloides</i> | <i>cerasinus</i>     | AY279638 | AY279741 | AY279844 | AY279947 |
| <i>Pseudolabrus</i>   | <i>gayi</i>          | AY279639 | AY279742 | AY279845 | AY279948 |
| <i>Pteragogus</i>     | <i>enneacanthus</i>  | AY279640 | AY279743 | AY279846 | AY279949 |
| <i>Pteragogus</i>     | <i>cryptus</i>       | AY279641 | AY279744 | AY279847 | AY279950 |
| <i>Scarus</i>         | <i>dimidiatus</i>    | AY279642 | AY279745 | AY279848 | AY279951 |
| <i>Scarus</i>         | <i>frenatus</i>      | AY279643 | AY279746 | AY279849 | AY279952 |
| <i>Semicossyphus</i>  | <i>pulcher</i>       | AY279644 | AY279747 | AY279850 | AY279953 |
| <i>Sparisoma</i>      | <i>chrysopterum</i>  | AY279645 | AY279748 | AY279851 | AY279954 |
| <i>Stethojulius</i>   | <i>bandenensis</i>   | AY279646 | AY279749 | AY279852 | AY279955 |
| <i>Stethojulius</i>   | <i>trilineata</i>    | AY279647 | AY279750 | AY279853 | AY279956 |
| <i>Tautoga</i>        | <i>onitis</i>        | AY279648 | AY279751 | AY279854 | AY279957 |
| <i>Tautogolabrus</i>  | <i>adspersa</i>      | AY279649 | AY279752 | AY279855 | AY279958 |
| <i>Thalassoma</i>     | <i>bifasciatum</i>   | AY279650 | AY279753 | AY279856 | AY279959 |
| <i>Thalassoma</i>     | <i>lunare</i>        | AY279651 | AY279754 | AY279857 | AY279960 |
| <i>Wetmorella</i>     | <i>nigropinnata</i>  | AY279652 | AY279755 | AY279858 | AY279961 |
| <i>Xiphocheilus</i>   | <i>typus</i>         | AY279653 | AY279756 | AY279859 | AY279962 |
| <i>Iniistius</i>      | <i>aneitensis</i>    | AY279654 | AY279757 | AY279860 | AY279963 |
| <i>Xyrichtys</i>      | <i>martinicensis</i> | AY279655 | AY279758 | AY279861 | AY279964 |

(B) Biomechanical characters analyzed in context of labrid phylogeny.

\* Due to fundamental design changes, *Epibulus* and *Scarus* cannot be compared with the same biomechanical characters, so are given a separate character state.

|                        |                          | MA Jaw Close (A2) | MA Jaw Open | Maxillary KT |
|------------------------|--------------------------|-------------------|-------------|--------------|
| <i>Achoerodus</i>      | <i>viridis</i>           | 0.36              | 0.18        | 0.93         |
| <i>Anampses</i>        | <i>caeruleopunctatus</i> | 0.15              | 0.30        | 0.47         |
| <i>Anampses</i>        | <i>neoguinaicus</i>      | 0.25              | 0.26        | 0.47         |
| <i>Austrolabrus</i>    | <i>maculatus</i>         | 0.27              | 0.16        | 0.97         |
| <i>Bodianus</i>        | <i>mesothorax</i>        | 0.27              | 0.16        | 0.93         |
| <i>Bodianus</i>        | <i>rufus</i>             | 0.29              | 0.07        | 0.97         |
| <i>Cheilinus</i>       | <i>fasciatus</i>         | 0.35              | 0.18        | 0.68         |
| <i>Cheilinus</i>       | <i>oxycephalus</i>       | 0.30              | 0.17        | 1.34         |
| <i>Cheilinus</i>       | <i>undulatus</i>         | 0.39              | 0.25        | 0.75         |
| <i>Cheilio</i>         | <i>inermis</i>           | 0.14              | 0.10        | 0.79         |
| <i>Chlorurus</i>       | <i>sordidus</i>          | 0.68              | 0.29        | 0.58         |
| <i>Choerodon</i>       | <i>anchorago</i>         | 0.41              | 0.20        | 0.59         |
| <i>Choerodon</i>       | <i>schoenleinii</i>      | 0.32              | 0.16        | 0.68         |
| <i>Cirrhilabrus</i>    | <i>lubbocki</i>          | 0.28              | 0.11        | 1.20         |
| <i>Clepticus</i>       | <i>parrae</i>            | 0.37              | 0.16        | 1.40         |
| <i>Coris</i>           | <i>aygula</i>            | 0.25              | 0.17        | 0.64         |
| <i>Coris</i>           | <i>batuensis</i>         | 0.31              | 0.17        | 0.75         |
| <i>Coris</i>           | <i>gaimaird</i>          | 0.31              | 0.19        | 0.87         |
| <i>Cryptotomus</i>     | <i>roseus</i>            | 0.40              | 0.13        | 1.36         |
| <i>Cymolutes</i>       | <i>praetextatus</i>      | 0.31              | 0.18        | 1.13         |
| <i>Cymolutes</i>       | <i>torquatus</i>         | 0.32              | 0.17        | 1.07         |
| <i>Diproctacanthus</i> | <i>xanthurus</i>         | 0.20              | 0.28        | 0.75         |
| <i>Epibulus</i>        | <i>insidiator</i>        | *                 | *           | *            |
| <i>Gomphosus</i>       | <i>varius</i>            | 0.22              | 0.09        | 1.15         |
| <i>Halichoeres</i>     | <i>argus</i>             | 0.22              | 0.19        | 0.82         |
| <i>Halichoeres</i>     | <i>bivittatus</i>        | 0.36              | 0.14        | 0.96         |
| <i>Halichoeres</i>     | <i>hartzfeldi</i>        | 0.29              | 0.19        | 0.65         |
| <i>Halichoeres</i>     | <i>hortulanus</i>        | 0.30              | 0.17        | 1.09         |
| <i>Halichoeres</i>     | <i>margaritaceus</i>     | 0.22              | 0.20        | 0.71         |
| <i>Halichoeres</i>     | <i>marginatus</i>        | 0.35              | 0.22        | 0.83         |
| <i>Halichoeres</i>     | <i>miniatus</i>          | 0.25              | 0.20        | 0.80         |
| <i>Halichoeres</i>     | <i>nicholsi</i>          | 0.32              | 0.13        | 0.86         |
| <i>Halichoeres</i>     | <i>notospilus</i>        | 0.27              | 0.16        | 0.71         |
| <i>Halichoeres</i>     | <i>radiatus</i>          | 0.28              | 0.17        | 0.79         |
| <i>Halichoeres</i>     | <i>scapularis</i>        | 0.25              | 0.18        | 0.91         |

|                         |                       |      |      |      |
|-------------------------|-----------------------|------|------|------|
| <i>Halichoeres</i>      | <i>papilionaceus</i>  | 0.31 | 0.20 | 0.83 |
| <i>Halichoeres</i>      | <i>solorensis</i>     | 0.30 | 0.17 | 1.09 |
| <i>Hemigymnus</i>       | <i>melapterus</i>     | 0.30 | 0.24 | 0.54 |
| <i>Hologymnosus</i>     | <i>doliatus</i>       | 0.23 | 0.15 | 0.98 |
| <i>Labrichthys</i>      | <i>unilineatus</i>    | 0.29 | 0.23 | 0.69 |
| <i>Labroides</i>        | <i>bicolor</i>        | 0.18 | 0.28 | 0.55 |
| <i>Labroides</i>        | <i>dimidiatus</i>     | 0.22 | 0.24 | 0.65 |
| <i>Labroides</i>        | <i>rubrolabiatus</i>  | 0.20 | 0.20 | 0.69 |
| <i>Labropsis</i>        | <i>australis</i>      | 0.20 | 0.35 | 0.59 |
| <i>Lachnolaimus</i>     | <i>maximus</i>        | 0.30 | 0.14 | 0.75 |
| <i>Larabicus</i>        | <i>quadrilineatus</i> | 0.25 | 0.22 | 0.71 |
| <i>Leptojulis</i>       | <i>cyanopleura</i>    | 0.29 | 0.12 | 0.84 |
| <i>Macropharyngodon</i> | <i>meleagris</i>      | 0.28 | 0.18 | 0.84 |
| <i>Macropharyngodon</i> | <i>geoffroy</i>       | 0.31 | 0.16 | 0.74 |
| <i>Malapterus</i>       | <i>reticulatus</i>    | 0.43 | 0.19 | 0.94 |
| <i>Neodax</i>           | <i>balteatus</i>      | 0.38 | 0.14 | 0.98 |
| <i>Nicholsina</i>       | <i>usta</i>           | 0.38 | 0.18 | 0.90 |
| <i>Notolabrus</i>       | <i>gymnogenis</i>     | 0.24 | 0.18 | 1.02 |
| <i>Novaculichthys</i>   | <i>taeniourus</i>     | 0.30 | 0.23 | 1.00 |
| <i>Novaculoides</i>     | <i>macrolepidotus</i> | 0.29 | 0.22 | 0.72 |
| <i>Odax</i>             | <i>acroptilus</i>     | 0.41 | 0.16 | 0.93 |
| <i>Ophthalmolepis</i>   | <i>lineolata</i>      | 0.31 | 0.14 | 0.97 |
| <i>Oxycheilinus</i>     | <i>bimaculatus</i>    | 0.20 | 0.18 | 0.95 |
| <i>Oxycheilinus</i>     | <i>celebicus</i>      | 0.37 | 0.13 | 1.10 |
| <i>Oxycheilinus</i>     | <i>unifasciatus</i>   | 0.28 | 0.14 | 0.80 |
| <i>Oxyjulis</i>         | <i>californica</i>    | 0.36 | 0.11 | 1.38 |
| <i>Pictilabrus</i>      | <i>laticlavata</i>    | 0.30 | 0.18 | 0.67 |
| <i>Pseudocheilinus</i>  | <i>octotaenia</i>     | 0.18 | 0.14 | 0.95 |
| <i>Pseudocoris</i>      | <i>yamashiroi</i>     | 0.18 | 0.12 | 1.35 |
| <i>Pseudodax</i>        | <i>moluccanus</i>     | 0.31 | 0.18 | 0.89 |
| <i>Pseudojuloides</i>   | <i>atavai</i>         | 0.21 | 0.15 | 0.92 |
| <i>Pseudojuloides</i>   | <i>cerasinus</i>      | 0.14 | 0.20 | 0.82 |
| <i>Pseudolabrus</i>     | <i>gayi</i>           | 0.35 | 0.11 | 1.05 |
| <i>Pteragogus</i>       | <i>enneacanthus</i>   | 0.36 | 0.16 | 1.00 |
| <i>Pteragogus</i>       | <i>cryptus</i>        | 0.38 | 0.17 | 1.51 |
| <i>Scarus</i>           | <i>dimidiatus</i>     | **   | 0.36 | 0.99 |
| <i>Scarus</i>           | <i>frenatus</i>       | **   | 0.38 | 0.74 |
| <i>Semicossyphus</i>    | <i>pulcher</i>        | 0.24 | 0.18 | 0.75 |
| <i>Sparisoma</i>        | <i>chrysopterum</i>   | 0.54 | 0.16 | 1.10 |
| <i>Stethojulis</i>      | <i>bandenensis</i>    | 0.34 | 0.30 | 0.65 |
| <i>Stethojulis</i>      | <i>trilineata</i>     | 0.27 | 0.26 | 0.80 |
| <i>Tautoga</i>          | <i>onitis</i>         | 0.40 | 0.24 | 1.39 |
| <i>Tautogolabrus</i>    | <i>adspersa</i>       | 0.34 | 0.12 | 0.99 |

|                     |                      |      |      |      |
|---------------------|----------------------|------|------|------|
| <i>Thalassoma</i>   | <i>bifasciatum</i>   | 0.40 | 0.15 | 0.93 |
| <i>Thalassoma</i>   | <i>lunare</i>        | 0.30 | 0.16 | 0.82 |
| <i>Wetmorella</i>   | <i>nigropinnata</i>  | 0.18 | 0.18 | 1.32 |
| <i>Xiphocheilus</i> | <i>typus</i>         | 0.30 | 0.12 | 0.86 |
| <i>Iniistius</i>    | <i>aneitensis</i>    | 0.33 | 0.25 | 0.91 |
| <i>Xyrichtys</i>    | <i>martinicensis</i> | 0.33 | 0.19 | 1.08 |

(C) Photo credits for images on labrid phylogeny (Fig. 1) from top to bottom.

|                         |                      |                          |
|-------------------------|----------------------|--------------------------|
| <i>Ptychochromis</i>    | <i>oligacanthus</i>  | Juan Miguel Artigas Azas |
| <i>Embiotoca</i>        | <i>jacksoni</i>      | Mark W. Westneat         |
| <i>Abudefduf</i>        | <i>sordidus</i>      | Jeffrey T. Williams      |
| <i>Lachnolaimus</i>     | <i>maximus</i>       | John E. Randall          |
| <i>Pseudodax</i>        | <i>moluccanus</i>    | John E. Randall          |
| <i>Bodianus</i>         | <i>mesothorax</i>    | Jeffrey T. Williams      |
| <i>Odax</i>             | <i>acroptilus</i>    | Bernard Yau              |
| <i>Choerodon</i>        | <i>anchorago</i>     | Jeffrey T. Williams      |
| <i>Scarus</i>           | <i>frenatus</i>      | John E. Randall          |
| <i>Sparisoma</i>        | <i>chrysopterus</i>  | John E. Randall          |
| <i>Tautoga</i>          | <i>onitis</i>        | Don Flescher             |
| <i>Epibulus</i>         | <i>insidiator</i>    | Jeffrey T. Williams      |
| <i>Cheilinus</i>        | <i>oxycephalus</i>   | Jeffrey T. Williams      |
| <i>Cirrhilabrus</i>     | <i>lubbocki</i>      | John E. Randall          |
| <i>Pteragogus</i>       | <i>cryptus</i>       | Jeffrey T. Williams      |
| <i>Malapterus</i>       | <i>reticulatus</i>   | Mark W. Westneat         |
| <i>Novaculichthys</i>   | <i>taeniourus</i>    | Jeffrey T. Williams      |
| <i>Xyrichtys</i>        | <i>aneitensis</i>    | John E. Randall          |
| <i>Chelio</i>           | <i>inermis</i>       | Jeffrey T. Williams      |
| <i>Coris</i>            | <i>gaimaird</i>      | John E. Randall          |
| <i>Pseudolabrus</i>     | <i>gayi</i>          | Mark W. Westneat         |
| <i>Pseudojuloides</i>   | <i>cerasinus</i>     | Jeffrey T. Williams      |
| <i>Thalassoma</i>       | <i>lunare</i>        | Jeffrey T. Williams      |
| <i>Gomphosus</i>        | <i>varius</i>        | Jeffrey T. Williams      |
| <i>Hemigymnus</i>       | <i>melapterus</i>    | John E. Randall          |
| <i>Oxyjulis</i>         | <i>californica</i>   | Mark W. Westneat         |
| <i>Halichoeres</i>      | <i>bivittatus</i>    | Paul Humann              |
| <i>Stethojulis</i>      | <i>trilineata</i>    | John E. Randall          |
| <i>Diproctacanthus</i>  | <i>xanthurus</i>     | Jeffrey T. Williams      |
| <i>Labropsis</i>        | <i>australis</i>     | Jeffrey T. Williams      |
| <i>Labroides</i>        | <i>dimidiatus</i>    | Jeffrey T. Williams      |
| <i>Halichoeres</i>      | <i>hartzfeldi</i>    | Jeffrey T. Williams      |
| <i>Leptojulius</i>      | <i>cyanopleura</i>   | John E. Randall          |
| <i>Anampses</i>         | <i>neoguinaicus</i>  | Jeffrey T. Williams      |
| <i>Halichoeres</i>      | <i>hortulanus</i>    | Jeffrey T. Williams      |
| <i>Macropharyngodon</i> | <i>meleagris</i>     | Jeffrey T. Williams      |
| <i>Halichoeres</i>      | <i>margaritaceus</i> | Jeffrey T. Williams      |
| <i>Halichoeres</i>      | <i>marginatus</i>    | Jeffrey T. Williams      |
| <i>Halichoeres</i>      | <i>argus</i>         | Jeffrey T. Williams      |
